# Supplementary material
Source: PubMed Central journal article supplement (PMC6397683)
Supplement: NIHMS1509809-supplement-1.pdf [file NIHMS1509809-supplement-1.pdf]

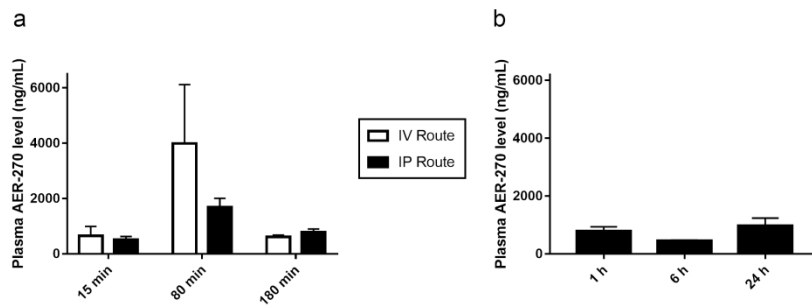

**Supplemental Figure S1.** Pharmacokinetic studies. (a) Comparison of intravenous and intraperitoneal bolus dosing of AER-271. (b) Drug levels with intraperitoneal loading bolus and subcutaneous continuous osmotic infusion pump. Mean  $\pm$  standard error of the mean.

236x88mm (300 x 300 DPI)

## Supplemental Table S1. Physiologic data and serum chemistry

|                                           | CA-Vehicle  |             |             |             | CA-AER-271  |             |             |             |
|-------------------------------------------|-------------|-------------|-------------|-------------|-------------|-------------|-------------|-------------|
|                                           | Baseline    | 10-min      | 30-min      | 60-min      | Baseline    | 10-min      | 30-min      | 60-min      |
| <b>Heart rate</b><br>(bpm)                | 360 ± 6     | 352 ± 15    | 383 ± 9     | 348 ± 6     | 367 ± 6     | 362 ± 5     | 398 ± 10    | 353 ± 6     |
| <b>MAP</b><br>(mmHg)                      | 65 ± 1      | 80 ± 2      | 52 ± 2      | 50 ± 1      | 66 ± 2      | 77 ± 2      | 51 ± 1      | 51 ± 1      |
| <b>Temperature</b><br>(°C)                | 37.3 ± 0.0  | 37.1 ± 0.1  | 37.2 ± 0.0  | 37.1 ± 0.0  | 37.2 ± 0.0  | 37.0 ± 0.1  | 37.2 ± 0.0  | 37.2 ± 0.0  |
| <b>End-tidal CO<sub>2</sub></b><br>(mmHg) | 37 ± 0      | 34 ± 1      | 35 ± 1      | 36 ± 1      | 37 ± 0      | 36 ± 1      | 35 ± 1      | 36 ± 1      |
| <b>pH</b>                                 | 7.38 ± 0.01 | 7.36 ± 0.02 | 7.47 ± 0.01 | 7.48 ± 0.01 | 7.38 ± 0.01 | 7.36 ± 0.01 | 7.49 ± 0.01 | 7.46 ± 0.01 |
| <b>Lactate</b><br>(mmol/L)                | 2.2 ± 0.1   | 8.9 ± 0.1   | 4.0 ± 0.2   | 1.3 ± 0.1   | 2.4 ± 0.2   | 9.4 ± 0.1   | 5.9 ± 2.1   | 1.5 ± 0.1   |
| <b>Osmolarity</b><br>(mmol/kg)            | 286 ± 1     | 306 ± 1     | 299 ± 1     | 297 ± 1     | 287 ± 1     | 307 ± 1     | 300 ± 1     | 298 ± 1     |
| <b>Sodium</b><br>(mmol/L)                 | 138 ± 0     | 147 ± 0     | 146 ± 0     | 144 ± 0     | 138 ± 0     | 148 ± 0     | 145 ± 0     | 144 ± 0     |
| <b>Potassium</b><br>(mmol/L)              | 4.9 ± 0.1   | 4.2 ± 0.1   | 4.0 ± 0.1   | 4.0 ± 0.1   | 4.9 ± 0.1   | 4.4 ± 0.1   | 4.2 ± 0.1   | 4.3 ± 0.1   |
| <b>Glucose</b><br>(mg/dL)                 | 197 ± 6     | 208 ± 4     | 157 ± 3     | 178 ± 4     | 195 ± 4     | 206 ± 4     | 162 ± 5     | 182 ± 6     |
| <b>Hematocrit</b><br>(%)                  | 27.0 ± 0.3  | 27.7 ± 0.4  | 27.2 ± 0.4  | 25.3 ± 0.5  | 26.9 ± 0.4  | 27.2 ± 0.4  | 27.3 ± 0.4  | 25.8 ± 0.4  |

Mean ± SEM

Abbreviations: CA, cardiac arrest; MAP, mean arterial pressure; SEM, standard error of the mean
